# Supplementary material for: MicroRNA-199a-5p Affects Porcine Preadipocyte Proliferation and Differentiation
Source: PubMed Central journal article supplement (PMC4057746; doi:10.3390/ijms15058526), 2014-05-14

## Supplementary Information

**Table S1.** The sequence of primers used for real-time qPCR and amplifying the 3'UTR of Cav-1 mRNA.

| Gene                            | Accession number | Sequence (5'-3')                                                | Product size |
|---------------------------------|------------------|-----------------------------------------------------------------|--------------|
| <i>perilipin A</i>              | NM_001038638.1   | F: CAGCCAAGGAAGAGTCAGC<br>R: CCTGGAAGGTGTGTTGAGAG               | 107 bp       |
| <i>aP2</i>                      | HM453202         | F: GAGCACCATAACCTTAGATGGA<br>R: AAATTCTGGTAGCCGTGACA            | 121 bp       |
| <i>PPAR<math>\gamma</math></i>  | NM_214379        | F: AGGACTACCAAAGTGCCATCAAA<br>R: GAGGCTTTATCCCCACAGACAC         | 142 bp       |
| <i>LPL</i>                      | NM_214286.1      | F: GGAGAGAGGAAGGGAAAACAGAG<br>R: AGACCGACCAATAAACTGCAAAG        | 150 bp       |
| <i><math>\beta</math>-actin</i> | NM_007393        | F: GGACTTCGAGCAGGAGATGG<br>R: AGGAAGGAGGGCTGGAAGAG              | 138 bp       |
| <i>Cav-1</i>                    | NM_214438.2      | F: ATCCCAAGCATCTCAACG<br>R: AAGAGGGCAGACAGCAAA                  | 157 bp       |
| <i>Cav-1</i> 3'UTR              | -                | F: CCGCTCGAGAGGCAGTAACGAAAGA<br>R: ATTTGCGGCCGCGAAGGGTAAACTTTGG | 708 bp       |

Figure S1. Original data of one independent flow cytometry assay.

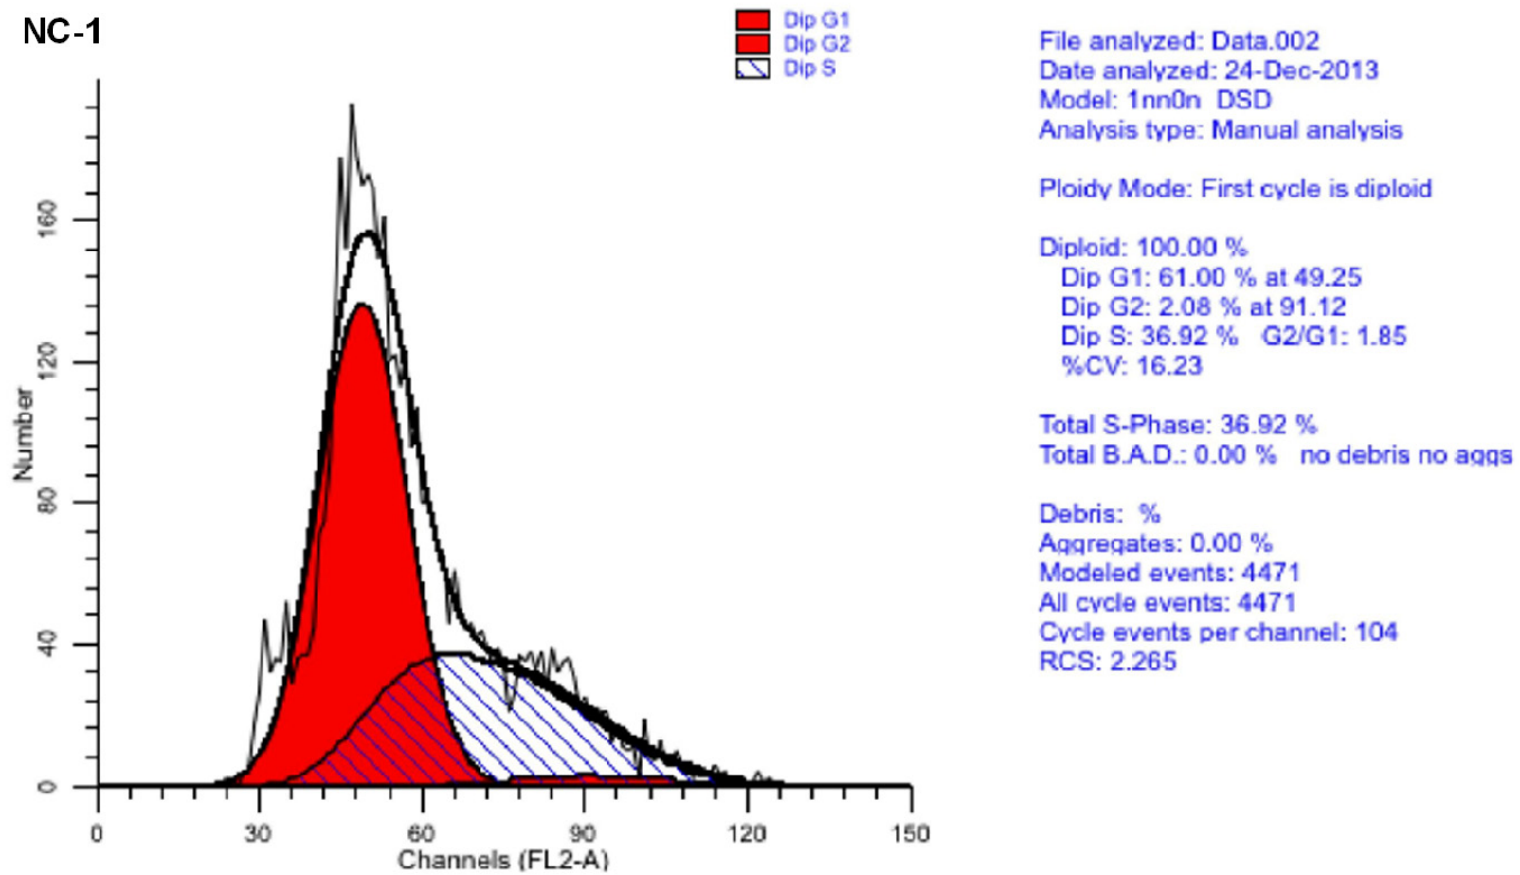

Figure S1. Cont.

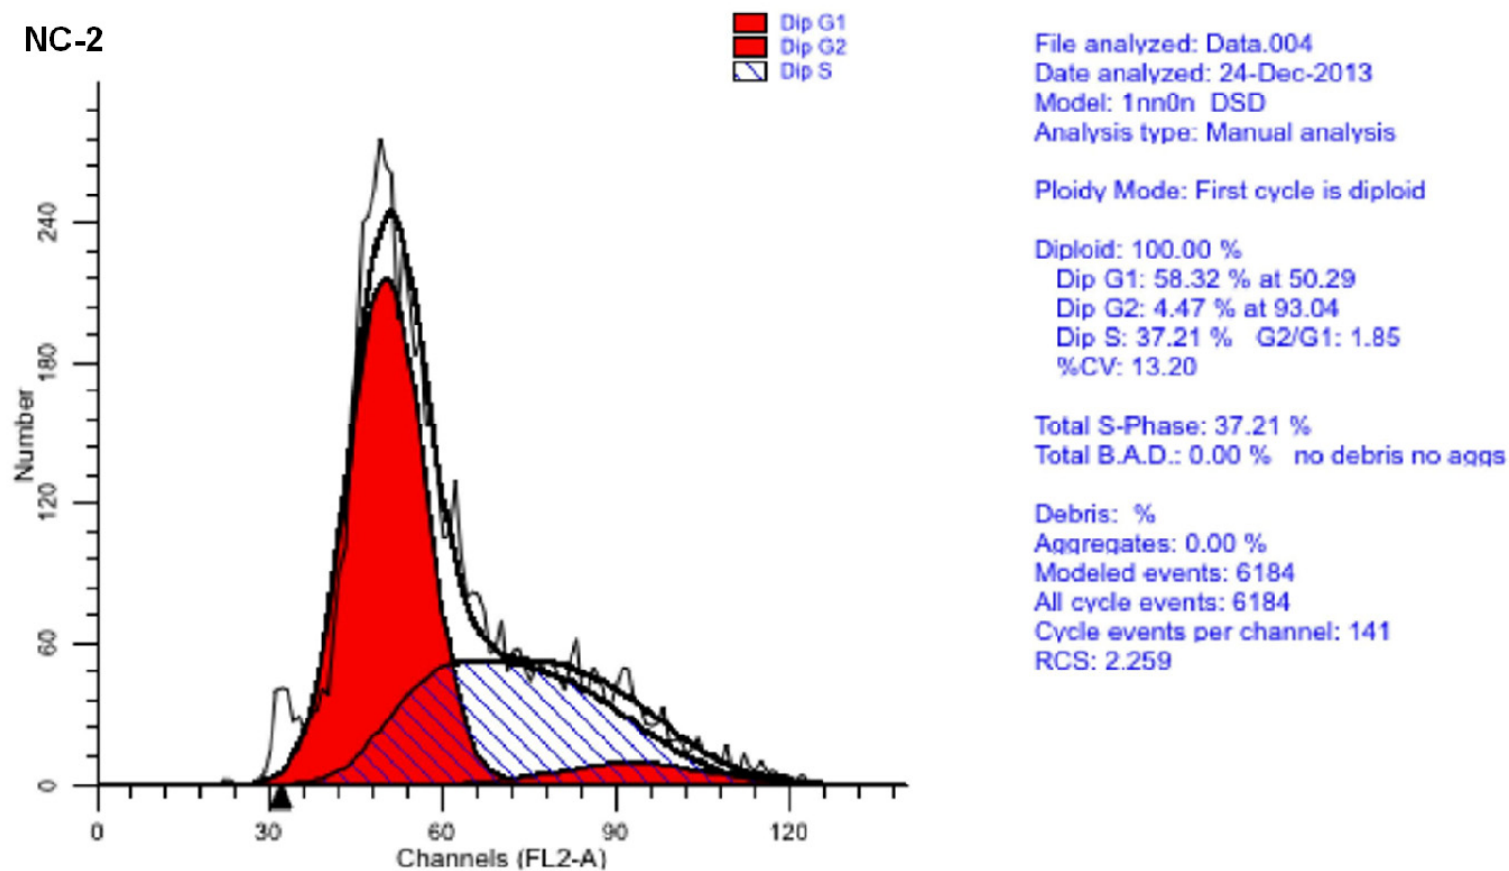

Figure S1. Cont.

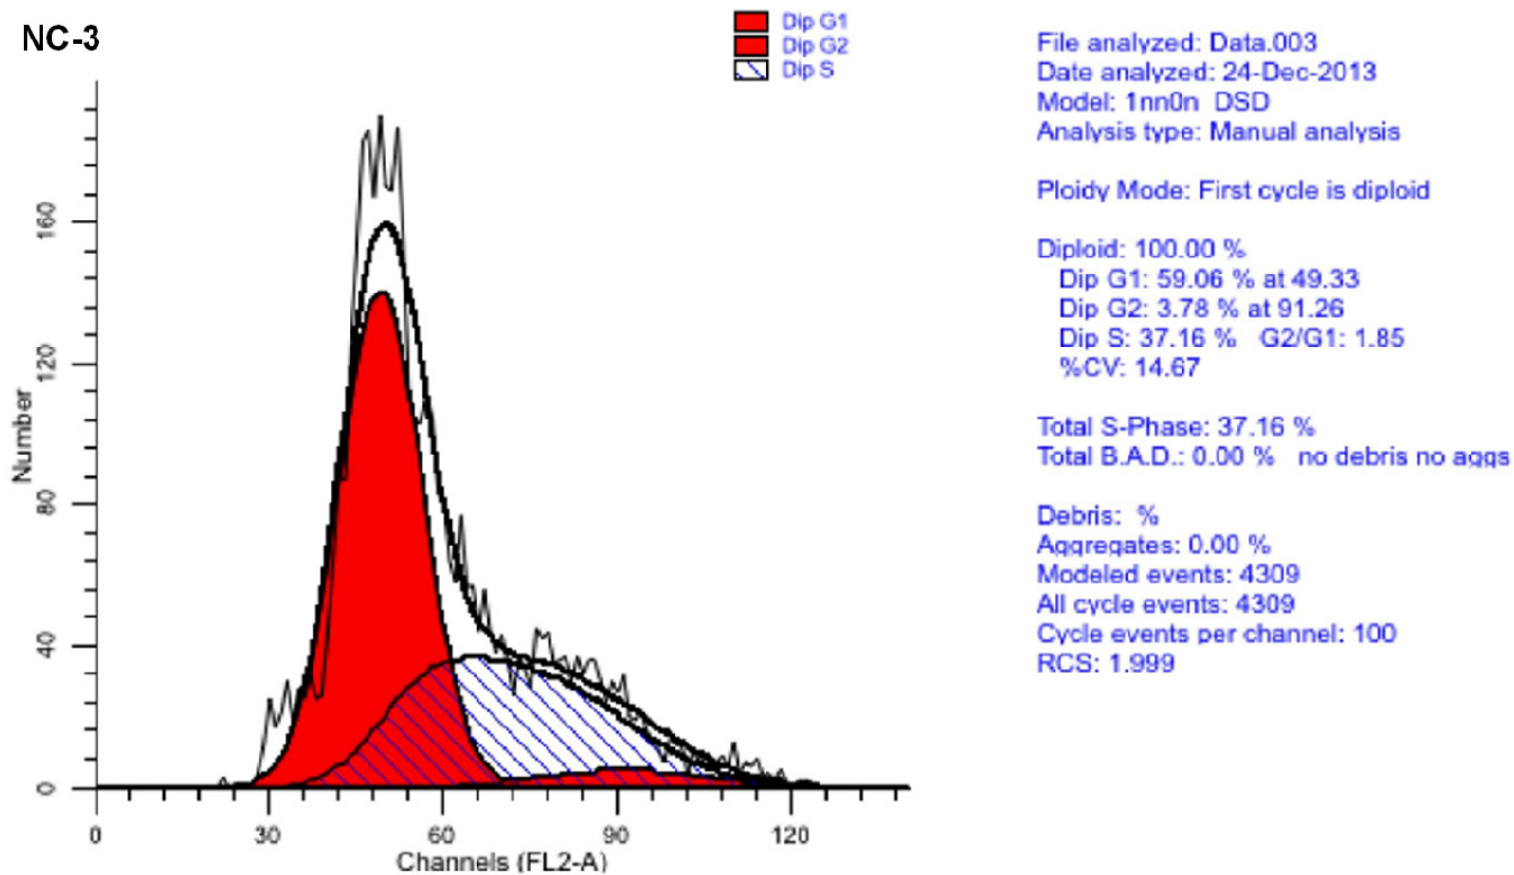

Figure S1. Cont.

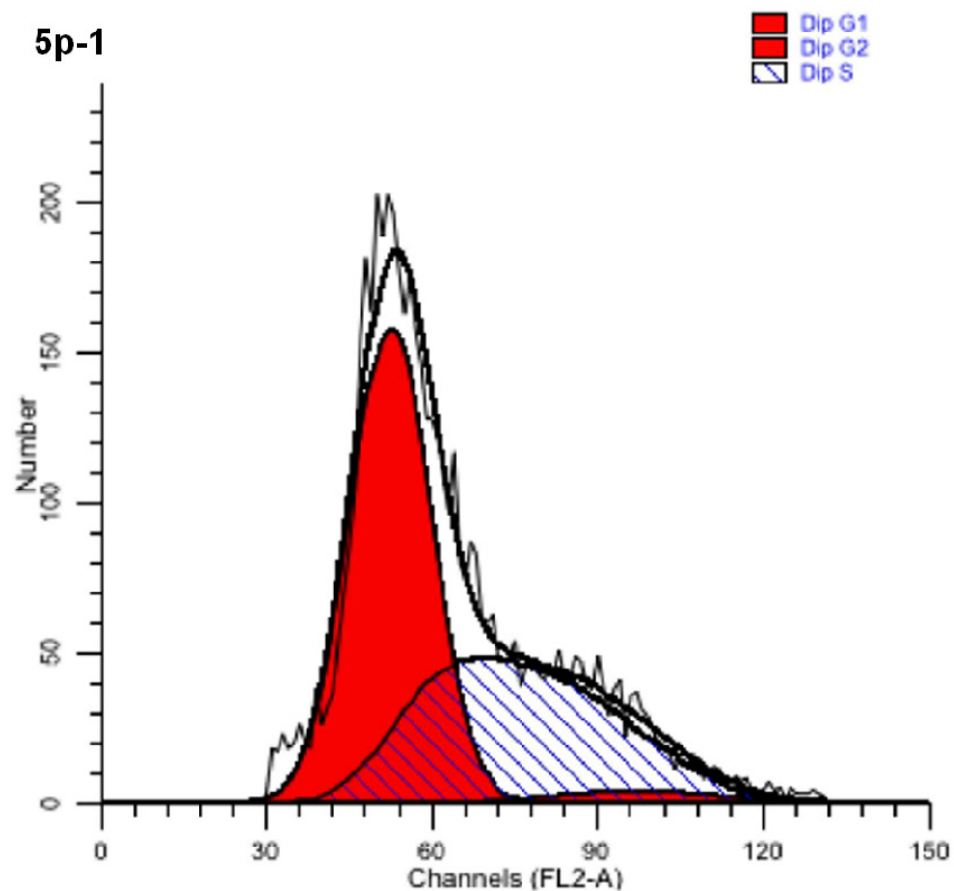

File analyzed: Data.007  
 Date analyzed: 24-Dec-2013  
 Model: 1nn0n DSD  
 Analysis type: Manual analysis

Ploidy Mode: First cycle is diploid

Diploid: 100.00 %  
 Dip G1: 55.25 % at 52.70  
 Dip G2: 2.72 % at 97.50  
 Dip S: 42.03 % G2/G1: 1.85  
 %CV: 13.86

Total S-Phase: 42.03 %  
 Total B.A.D.: 0.00 % no debris no aggs

Debris: %  
 Aggregates: 0.00 %  
 Modeled events: 5247  
 All cycle events: 5247  
 Cycle events per channel: 115  
 RCS: 1.449

Figure S1. Cont.

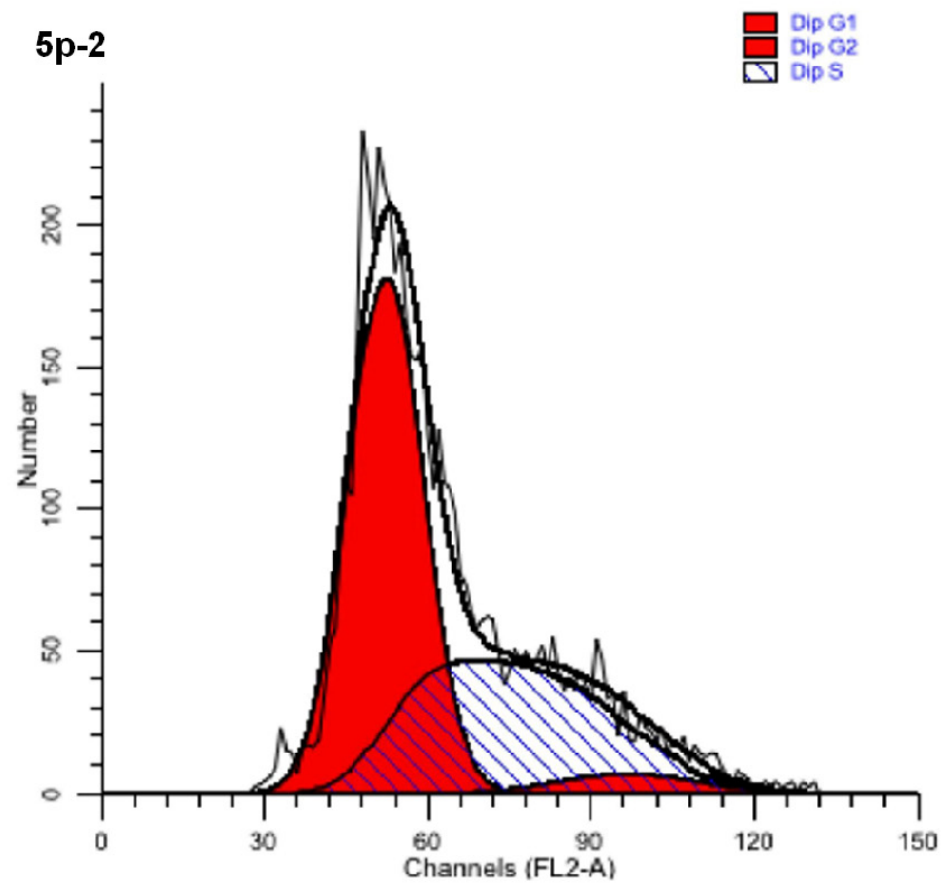

File analyzed: Data.006  
Date analyzed: 24-Dec-2013  
Model: 1nn0n DSD  
Analysis type: Manual analysis

Ploidy Mode: First cycle is diploid

Diploid: 100.00 %  
Dip G1: 56.59 % at 52.48  
Dip G2: 3.97 % at 97.09  
Dip S: 39.44 % G2/G1: 1.85  
%CV: 12.95

Total S-Phase: 39.44 %  
Total B.A.D.: 0.00 % no debris no aggs

Debris: %  
Aggregates: 0.00 %  
Modeled events: 5465  
All cycle events: 5465  
Cycle events per channel: 120  
RCS: 1.603

Figure S1. Cont.

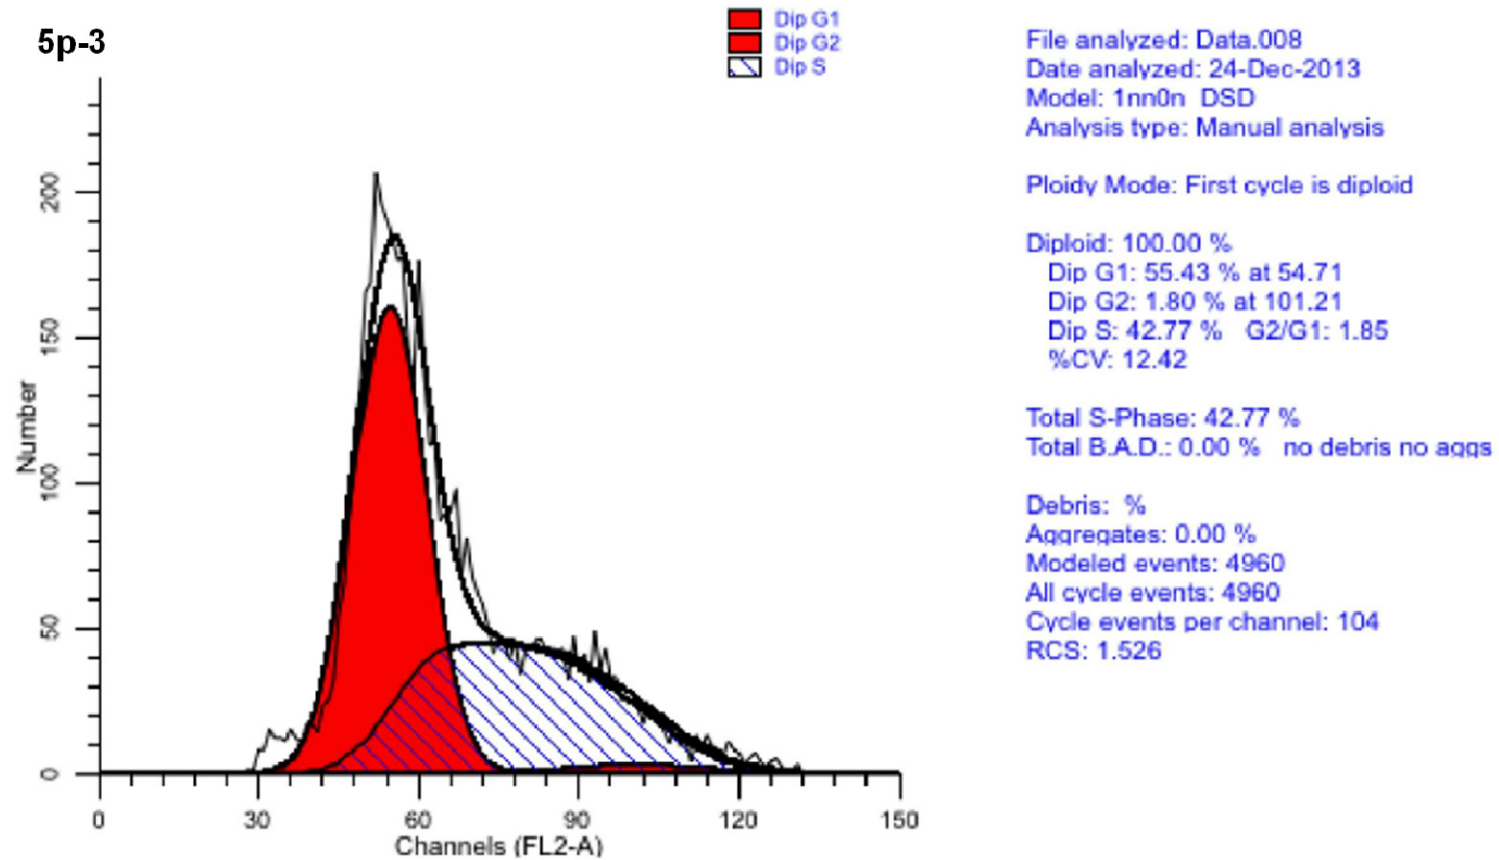

Supplement: ijms-15-08526-s001.pdf [file ijms-15-08526-s001.pdf]
